# Supplementary material for: New Maximum Likelihood Estimators for Eukaryotic Intron Evolution
Source: PLOS journal article supplement (doi:10.1371/journal.pcbi.0010079), 2005-12-22
Supplement: S1 (10.1371/journal.pcbi.0010079.s001) [file journal.pcbi.0010079.s001]

### Protocol S1: Proof for Proposition 1

Equations 3 and 5 can be rewritten as follows:

$$m_{iq} = \prod_{k=3}^B f_k \times \begin{cases} Q_{00} & \text{if } s_2 = 0 \& s_3 = 0 \\ Q_{01} & \text{if } s_2 = 0 \& s_3 = 1 \\ Q_{10} & \text{if } s_2 = 1 \& s_3 = 0 \\ Q_{11} & \text{if } s_2 = 1 \& s_3 = 1 \end{cases}, \quad (13)$$

$$p_i = \sum_{q=0}^{2^{M-1}-1} m_{iq} / P, \quad (14)$$

where:

$$Q_{00} = P(1-\lambda)(1-\alpha_1)(1-\alpha_2) + P\lambda\beta_1\beta_2, \quad (15)$$

$$Q_{01} = P(1-\lambda)(1-\alpha_1)\alpha_2 + P\lambda\beta_1(1-\beta_2), \quad (16)$$

$$Q_{10} = P(1-\lambda)\alpha_1(1-\alpha_2) + P\lambda(1-\beta_1)\beta_2, \quad (17)$$

$$Q_{11} = P(1-\lambda)\alpha_1\alpha_2 + P\lambda(1-\beta_1)(1-\beta_2). \quad (18)$$

Here,  $m_{iq}$  ( $i = 0, 1, \dots, 2^N - 1, q = 0, 1, \dots, 2^{M-1} - 1$ ) is the expected number of cases for the intron pattern  $iq$ , which is the combination of the  $i$ th external pattern with the  $q$ th internal pattern excluding the root node.  $s_2$  and  $s_3$  are the intron states of the two nodes, which are children of the root node.

It is clear from equations 13 and 14 that  $p_i$  (and consequently the log-likelihood value) will be invariant if  $Q_{00}, Q_{01}, Q_{10}, Q_{11}, \alpha_k$ , and  $\beta_k$  ( $k = 3, 4, \dots, B$ ) are constant. Moreover, the sum of  $Q_{00}, Q_{01}, Q_{10}$ , and  $Q_{11}$  is  $P$ , so there is one redundant equation in the four equations 15–18. As a result, there will be infinite sets of parameters  $\lambda, \alpha_1, \beta_1, \alpha_2$ , and  $\beta_2$  that produce the same values for  $Q_{00}, Q_{01}, Q_{10}$ , and  $Q_{11}$  (since there are five variables but only three equations).

It follows that there will be infinite sets of MLEs  $\hat{\lambda}, \hat{\alpha}_1, \hat{\beta}_1, \hat{\alpha}_2, \hat{\beta}_2$ .
